# Supplementary material for: Dexamethasone exacerbates cerebral edema and brain injury following lithium-pilocarpine induced status epilepticus
Source: PubMed Central journal article supplement (PMC3905166; doi:10.1016/j.nbd.2013.12.001), 2014-03

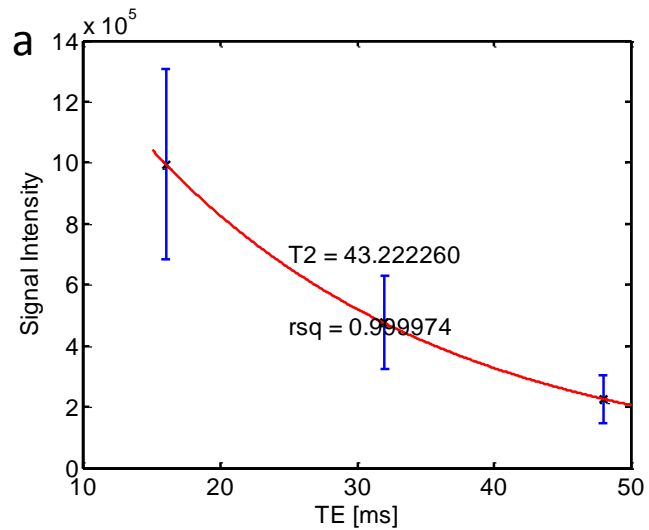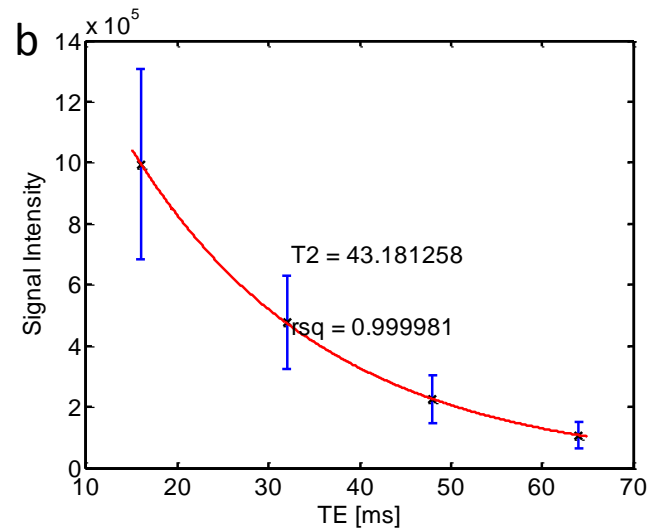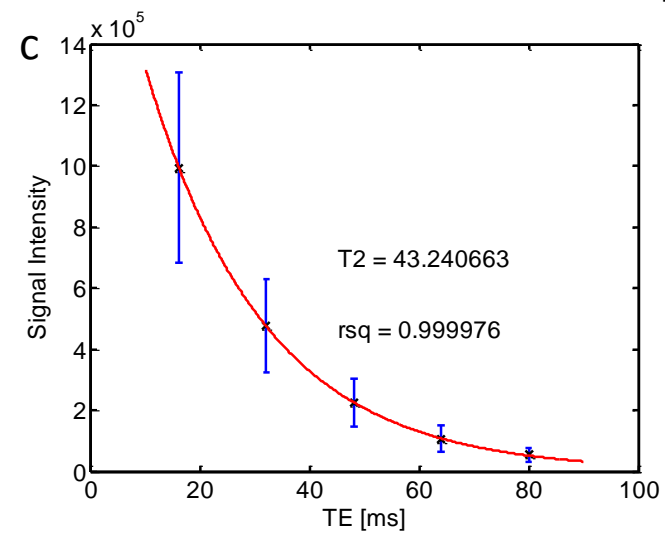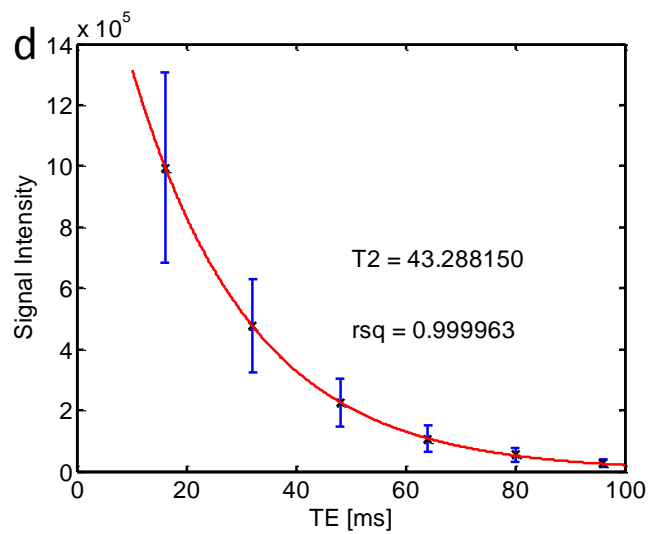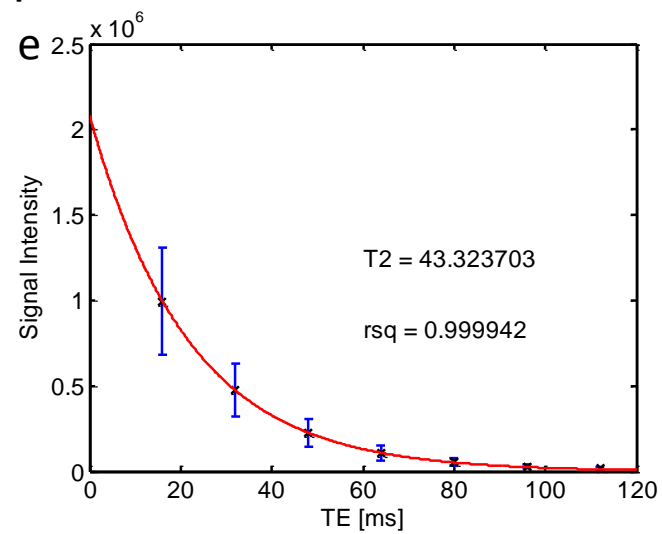

Supplement: mmc1.pdf [file mmc1.pdf]
